# Supplementary material for: The Impact of Pectin Supplementation on Intestinal Barrier Function in Healthy Young Adults and Healthy Elderly
Source: PubMed Central journal article supplement (PMC6683049; doi:10.3390/nu11071554), 2019-07-09
Supplement: nutrients-11-01554-s001.pdf [file nutrients-11-01554-s001.pdf]

## Supplementary Materials

**Table S1.** Forward and reverse primer sequences and final cDNA concentrations of all target genes, as determined in sigmoid biopsies.

| Name           | Gene description                         | Primer sequences                                                          | Final cDNA concentration |
|----------------|------------------------------------------|---------------------------------------------------------------------------|--------------------------|
| CAMP           | Cathelicidin antimicrobial peptide       | 5'-AGGATTGTGACTTCAAGAAGGACG-3'<br>5'-GTTTATTTCTCAGAGCCCAGAAGC-3'          | 80 ng/μl                 |
| CDH1           | Cadherin 1                               | 5'-CACCTGGAGAGAGGCCGCGT -3'<br>5'-AACGGAGGCCTGATGGGGCG -3'                | 20 ng/μl                 |
| CLDN2          | Claudin 2                                | 5'-AACTACTACGATGCCTACC-3'<br>5'-GAACTCACTCTTGACTTTGG -3'                  | 20 ng/μl                 |
| CLDN3          | Claudin 3                                | 5'-TTCATCGGCAGCAACATCATC-3'<br>5'-CGCCTGAAGGTCCTGTGG-3'                   | 20 ng/μl                 |
| CLDN4          | Claudin 4                                | 5'-ACAGACAAGCCTTACTCC-3'<br>5'-GGAAGAACAAAGCAGAG-3'                       | 20 ng/μl                 |
| CTNNB1         | Catenin beta 1                           | 5'-GTGCTATCTGTCTGCTCTAGTA -3'<br>5'-CTTCCTGTTTAGTTGCAGCATC -3'            | 20 ng/μl                 |
| DEFB1          | Defensin beta 1                          | 5'-CTCTGTCAGCTCAGCCTC-3'<br>5'-CTTGCAGCACTTGGCCTTCCC-3'                   | 20 ng/μl                 |
| GAPDH          | Glyceraldehyde-3-phosphate dehydrogenase | 5'-TGCACCACCAACTGCTTAGC-3'<br>5'-GGCATGGACTGTGGTCATGAG-3'                 | 20 ng/μl                 |
| IL1B           | Interleukin 1 beta                       | 5'-AAACAGATGAAGTGCTCCTTCCAGG-3'<br>5'-TGGAGAACACCACTTGTGCTCCA-3'          | 40 ng/μl                 |
| IL10           | Interleukin 10                           | 5'-TCAGGGTGGCGACTCTAT-3'<br>5'-TGGGCTTCTTTCTAAATCGTTC-3'                  | 80 ng/μl                 |
| MUC2           | Mucin 2                                  | 5'-GTCAACCCTGCCGACACCTG-3'<br>5'-ACTCACACCAGTAGAAAGGACAGC-3'              | 20 ng/μl                 |
| MLCK           | Myosin light chain kinase                | 5'-GCCTGACCACGAATATAAGTT-3'<br>5'-GCTCCTTCTCATCATCTG-3'                   | 20 ng/μl                 |
| OCN            | Occludin                                 | 5'-TCAGGGAATATCCACCTATCACTTCAG-3'<br>5'-CATCAGCAGCAGCCATGTACTCTTCAC-3'    | 20 ng/μl                 |
| TFF3           | Trefoil factor 3                         | 5'-CTTGCTGTCCTCCAGCTCT-3'<br>5'-CCGGTTGTTGCACTCCTT-3'                     | 20 ng/μl                 |
| TJP1<br>(ZO-1) | Tight junction protein 1                 | 5'-AGGGGCAGTGGTGGTTTTCTGTTCTTTC-3'<br>5'-GCAGAGGTCAAAGTTCAAGGCTCAAGAGG-3' | 20 ng/μl                 |
| TLR1           | Toll like receptor 1                     | 5'-CAGTGTCTGGTACACGCATGGT-3'<br>5'-TTTCAAAAACCGTGTCTGTTAAGAGA-3'          | 80 ng/μl                 |
| TLR2           | Toll like receptor 2                     | 5'-GCCAAAGTCTTGATTGATTGG-3'                                               | 20 ng/μl                 |

|         |                       |                                  |          |
|---------|-----------------------|----------------------------------|----------|
|         |                       | 5'-TATACCACAGGCCATGGAAAC-3'      |          |
| TLR4    | Toll like receptor 4  | 5'-CCTGCGTGAGACCAGAAAGC-3'       | 80 ng/μl |
|         |                       | 5'-TCAGCTCCATGCATTGATAAGTAATA-3' |          |
| TLR6    | Toll like receptor 6  | 5'-GAAGAAGAACAACCCTTTAGGATAGC-3' | 20 ng/μl |
|         |                       | 5'-AGGCAAACAAAATGGAAGCTT-3'      |          |
| TNF     | Tumor Necrosis Factor | 5'-CCGAGTGACAAGCCTGTAGC-3'       | 40 ng/μl |
|         |                       | 5'-GAGGACCTGGGAGTAGATGAG-3'      |          |
| 18S RNA | 18S ribosomal RNA     | 5'-GTAACCCGTTGAACCCCAT-3'        | 20 ng/μl |
|         |                       | 5'-CCATCCAATCGGTAGTAGCG-3'       |          |

**Table S2.** Baseline characteristics of the subgroups of young adults (n=22) and elderly (n=22), undergoing sigmoidoscopy after the pectin or placebo intervention

|                                             | Young adults (n=22) |                |         | Elderly (n=22) |                |         |
|---------------------------------------------|---------------------|----------------|---------|----------------|----------------|---------|
|                                             | Pectin (n=12)       | Placebo (n=10) | P-value | Pectin (n=12)  | Placebo (n=10) | P-value |
| Age (yrs, mean ± SD)                        | 23.9 ± 4.6          | 24.2 ± 5.4     | 0.893   | 70.4 ± 3.0     | 70.7 ± 2.8     | 0.784   |
| Sex (% female)                              | 58.3                | 30.0           | 0.184   | 41.7           | 20.0           | 0.277   |
| BMI (kg/m <sup>2</sup> , mean ± SD)         | 22.3 ± 2.8          | 23.7 ± 3.2     | 0.299   | 25.6 ± 2.6     | 27.3 ± 1.7     | 0.083   |
| Serum CRP (mg/L, mean ± SD)                 | 1.8 ± 1.8           | 0.6 ± 0.7      | 0.061   | 0.7 ± 0.6      | 1.8 ± 1.6      | 0.032   |
| Medication (%)                              |                     |                |         |                |                |         |
| PPI                                         |                     |                |         | 8.3            | 20.0           | 0.427   |
| Statins                                     | N.A.                | N.A.           | N.A.    | 8.3            | 0              | 0.350   |
| Antihypertensives                           |                     |                |         | 0              | 10             | 0.262   |
| Alcohol consumption (units/week, mean ± SD) | 3.0 ± 2.7           | 6.3 ± 6.3      | 0.156   | 5.5 ± 5.0      | 10.8 ± 6.8     | 0.049   |

BMI: body mass index, CRP: C-reactive protein, N.A: not applicable, PPI: proton-pump inhibitors. Age, BMI, CRP and alcohol consumption were compared between intervention groups with the use of an independent samples t-test. Sex and medication were compared between intervention groups with the use of a Pearson Chi-square test.

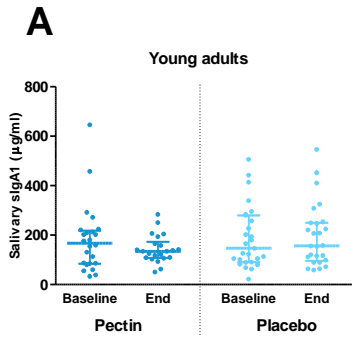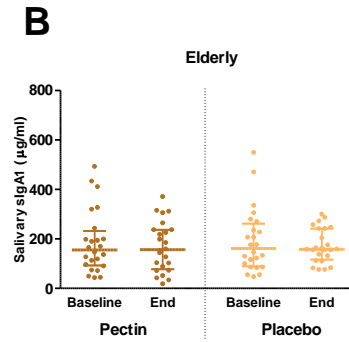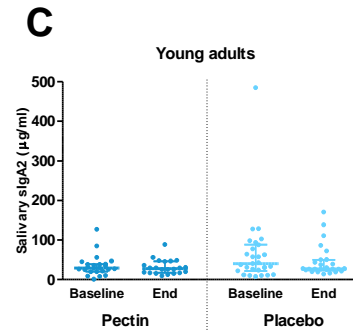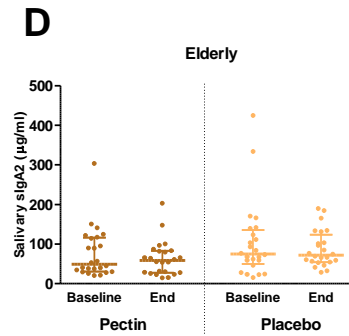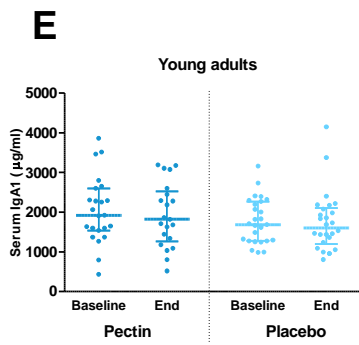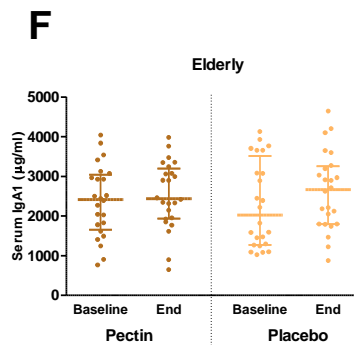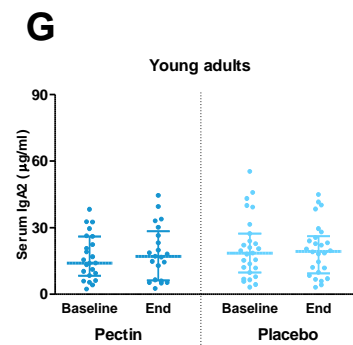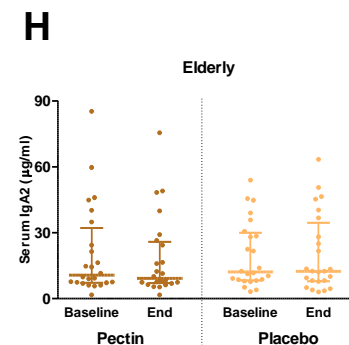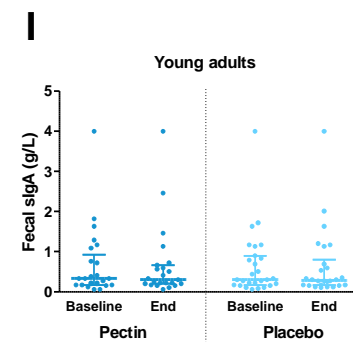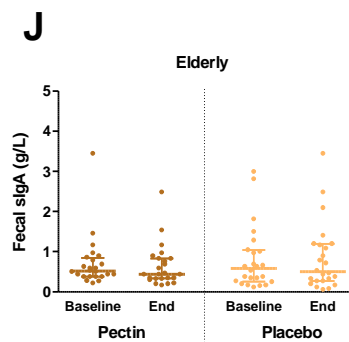

**Figure S1.** Mucosal defense parameters at baseline and after four weeks of pectin (circles) or placebo (triangles) intervention in young adults and elderly. A: Salivary sIgA1 ( g/ml) in young adults. B: Salivary sIgA1 ( g/ml) in elderly. C: Salivary sIgA2 ( g/ml) in young adults. D: Salivary sIgA2 ( g/ml) in elderly. E: Serum IgA1 ( g/ml) in young adults. F: Serum IgA1 ( g/ml) in elderly. G: Serum IgA2 ( g/ml) in young adults. H: Serum IgA2 ( g/ml) in elderly. I: Fecal sIgA (g/L) in young adults. J: Fecal sIgA (g/L) in elderly. Values are presented in scatter plots with median line and IQR (25-75th interquartile range). Sample sizes vary due to drop-outs and technical reasons. Within age groups, mucosal defense parameters were compared between intervention groups with unstructured linear mixed models and correction for baseline values. IgA, Immunoglobulin A; sIgA, secretory Immunoglobulin A.

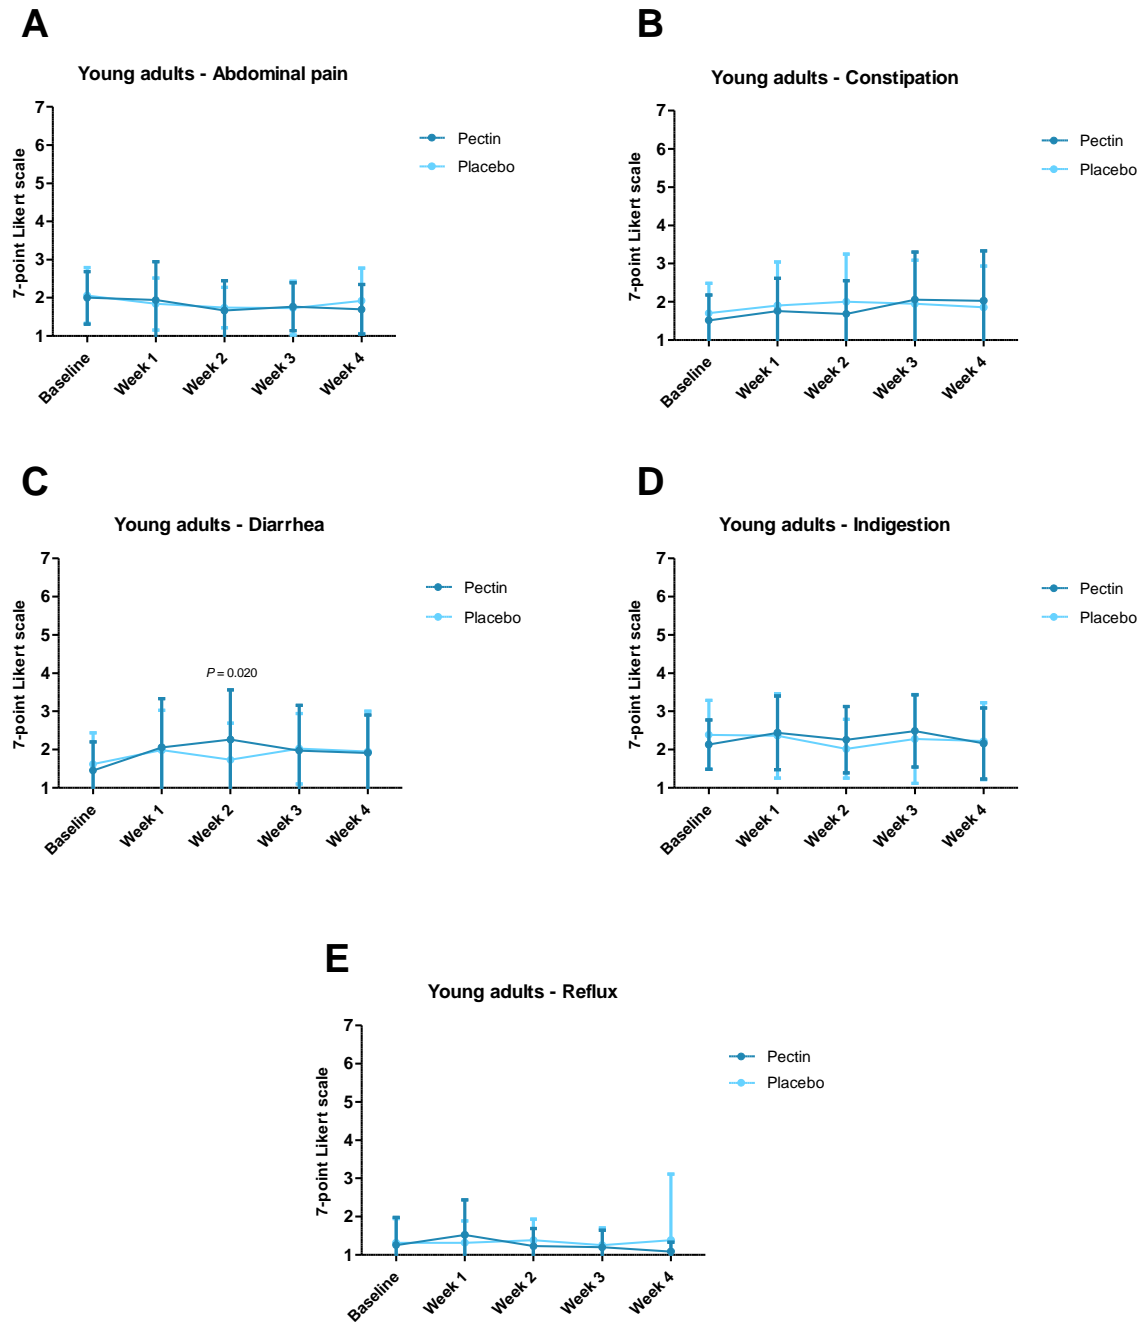

**Figure S2.** Gastrointestinal symptoms at baseline and every week of pectin (fixed lines) and placebo (dashed lines) intervention in young adults. A: Abdominal pain scores. B: Constipation scores. C:

Diarrhea scores. D: Indigestion scores. E: Reflux scores. Means and standard deviations are shown. Missing values at specific weeks were due to drop-outs. Gastrointestinal symptom scores were compared between intervention groups with random intercept linear mixed models and correction for baseline values. *P*-values per time point were corrected for multiple testing by calculating the false-discovery-rate (FDR) of Benjamini-Hochberg.

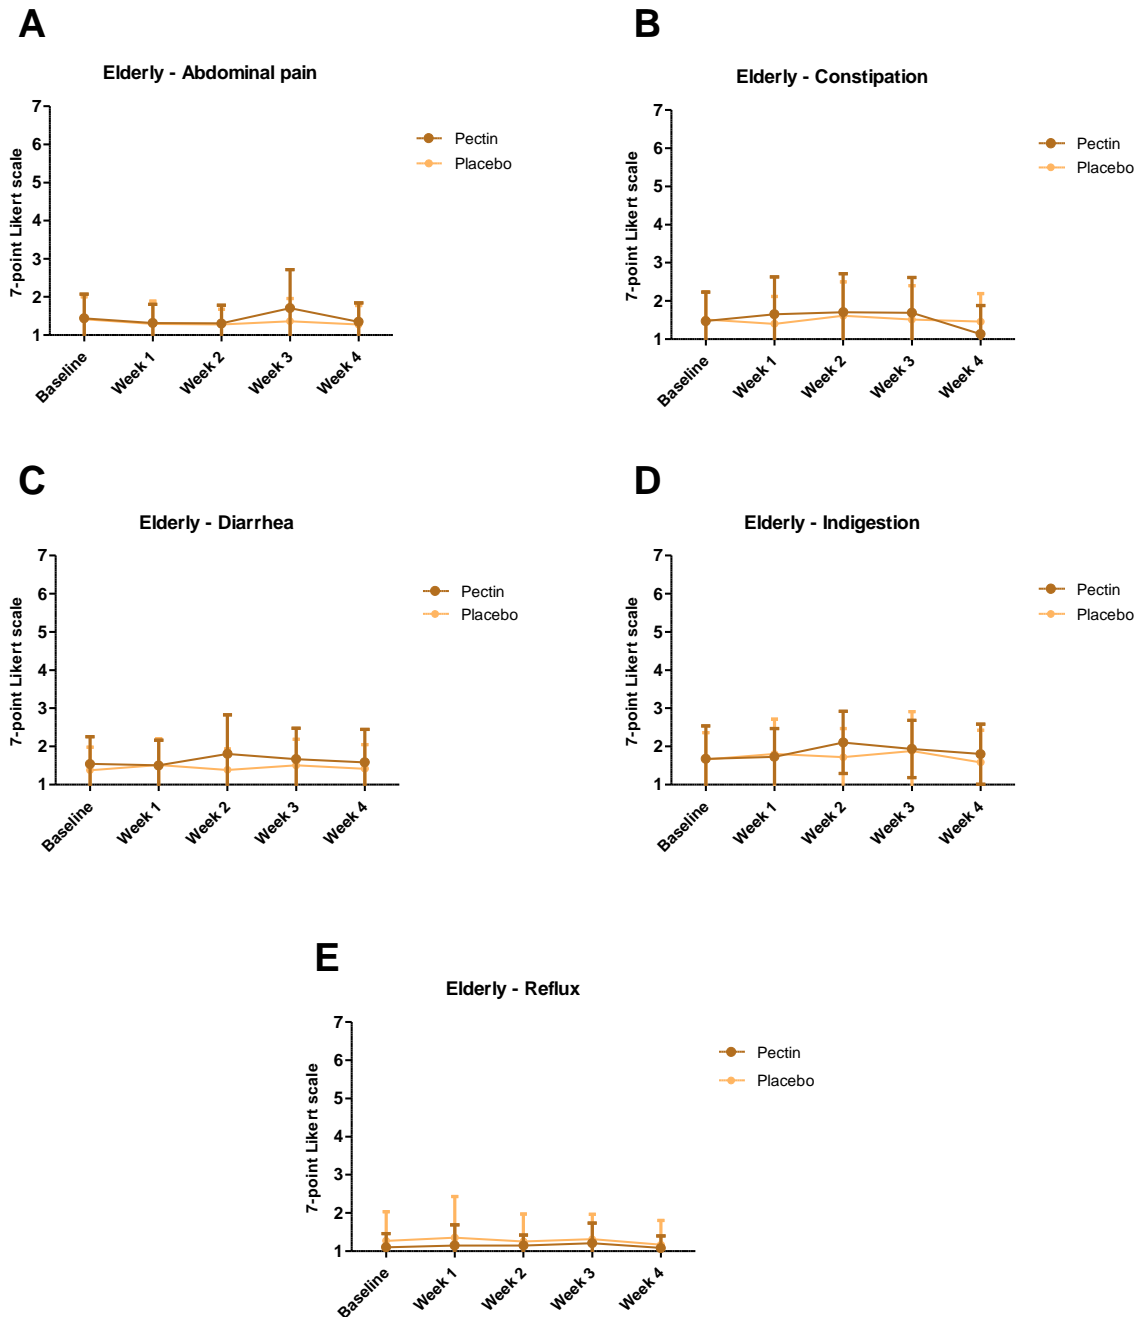

**Figure S3.** Gastrointestinal symptoms at baseline and every week of pectin (fixed lines) and placebo (dashed lines) intervention in elderly. A: Abdominal pain scores. B: Constipation scores. C: Diarrhea scores. D: Indigestion scores. E: Reflux scores. Means and standard deviations are shown. Gastrointestinal symptom scores were compared between intervention groups with random intercept linear mixed models and correction for baseline values. *P*-values per time point were corrected for multiple testing by calculating the false-discovery-rate (FDR) of Benjamini-Hochberg.

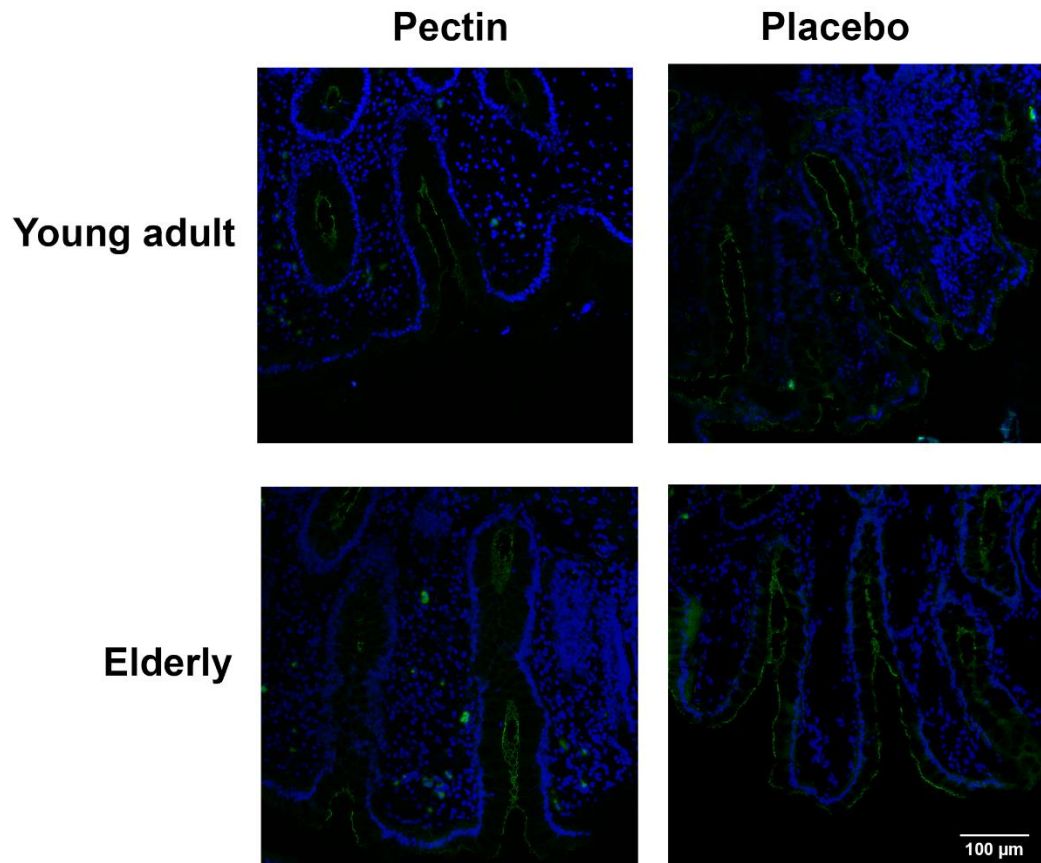

**Figure S4.** Representative images of tight junction protein TJP1 (green) immunofluorescence staining in sigmoid biopsy sections of a healthy young adult and healthy elderly after four weeks pectin or placebo intervention. Scale bar represents 100  $\mu\text{m}$ . Blue counterstaining (DAPI) shows nuclei. TJP1: Tight junction protein 1.

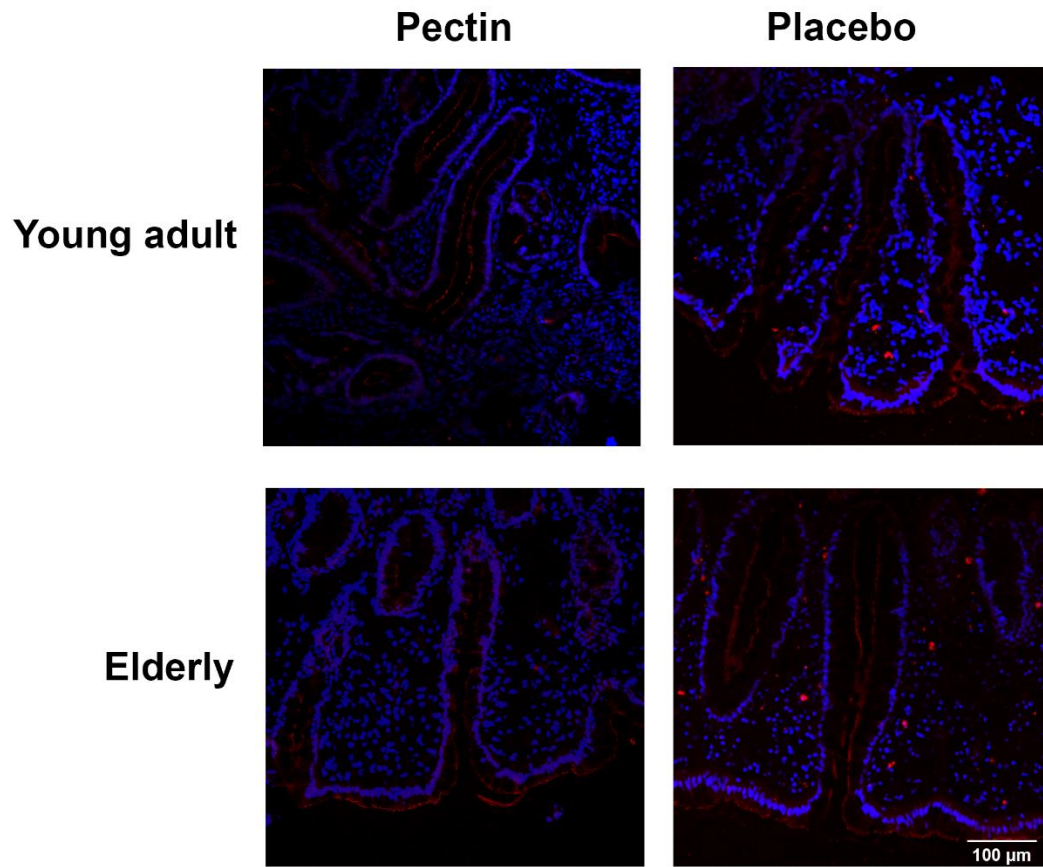

**Figure S5.** Representative images of tight junction protein occludin (red) immunofluorescence staining in sigmoid biopsy sections of a healthy young adult and healthy elderly after four weeks pectin or placebo intervention. Scale bar represents 100  $\mu\text{m}$ . Blue counterstaining (DAPI) shows nuclei.
